# Supplementary material for: Carbon isotope chemostratigraphy, geochemistry, and biostratigraphy of the Paleocene–Eocene Thermal Maximum, deepwater Wilcox Group, Gulf of Mexico (USA)
Source: Copernicus journal article supplement (doi:10.5194/cp-19-1743-2023), 2023-09-05
Supplement: Supplementary file 1 [file cp-19-1743-2023-supplement.zip]

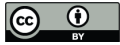

*Supplement of*

**Carbon isotope chemostratigraphy, geochemistry, and biostratigraphy of the Paleocene–Eocene Thermal Maximum, deepwater Wilcox Group, Gulf of Mexico (USA)**

**Glenn R. Sharman et al.**

*Correspondence to:* Glenn R. Sharman (gsharman@uark.edu)

- cp-19-1743-2023-supplement-title-page.pdf
- Figure S1\_XRD plots R1.pdf
- Table S1 PETM localities R1\_v2.xlsx
- Table S2 Oil extraction efficiency.xlsx
- Table S3 Sample treatment comparison.xlsx
- Table S4 Lag time analysis R1.xlsx
- Table S5 Trace Metals.xlsx

The copyright of individual parts of the supplement might differ from the article licence.
