# Supplementary material for: Carbon isotope chemostratigraphy, geochemistry, and biostratigraphy of the Paleocene–Eocene Thermal Maximum, deepwater Wilcox Group, Gulf of Mexico (USA)
Source: Copernicus journal article supplement (doi:10.5194/cp-19-1743-2023), 2023-09-05
Supplement: Supplementary file 1 [file Table S1 PETM localities R1_v2.xlsx]

## Sheet: Table S1
Table S1. Compilation of PETM localities
Site_ID	Site Name	Location	Latitude	Longitude	Latitude_Scotese	Longitude_Scotese	Depositional environment	Depo_class_pre_PETM	Sed_type	PETM_lith	PETM_change	PETM_change_class	CIE_m	CIE truncated?	Source(s)	Notes
1	IDOP Site M004	Lomonsov Ridge, Arctic	87.87	136.18	81.4534	43.8769	Shelf (close to shore, brackish)	04_Shelfal (inner to middle neritic)	Terrigenous	Terrigenous mudstone	No change in grain size (?)	06_No_change	6.78334		Denis et al. (2017) Fig. 2	Note there is uncertainty in the thickness of the CIE due to incomplete coring. Depositional setting described as "close to shore" and "brackish".
2	Longyearbyen	Spitsbergen	78.22	15.63	73.5116	9.18469	Nearshore shelf	04_Shelfal (inner to middle neritic)	Terrigenous	Terrigenous mudstone (clay and silt)	Decrease in grain size	02_Decrease_terrigenous_grain_size	14		Harding et al. (2011) Fig. 3	Onset identified, but not recovery. Underlying formation is coaser grained with evidence for terrestrial deposition.
3	Core BH 9/05	Spitsbergen	77.83	16.5	73.1381	9.92552	Outer shelf	05_Shelfal (outer) to slope	Terrigenous	Terrigneous mudstone (clay and silt)	Decrease in grain size	02_Decrease_terrigenous_grain_size	56.2628		Wieczorek et al. (2013) Fig. 2	Note that the CIE thickness from Fig. 2 is slightly different from the thickness (49m) stated in the text. Fig. 5 of Dypvik et al. (2011) shows a log of the core. Pre-PETM litholgoies (up to very fine ss, with thin pebble beds) fine upwards within the CIE to silts and clays
4	Wells offshore western Greenland	Atlantic	66.93	-56.58	61.0372	-30.9179	Shallow marine to paralic (Rolle, 1985)	04_Shelfal (inner to middle neritic)	Uncertain						Nøhr-Hansen et al. (2003)	No CIE found in this publication
5	Well 221/20a-4	North Sea	57.73	1.83	52.8888	-0.282758	Restricted marine basin, deeper than 500 m, terrigenous sediment supply	06_Deep-marine	Terrigenous	Well-bedded gray mudstone, becoming laminated mudstone upwards	Increase in laminated claystone relative to non-laminated claystone, modest decrease in sand within CIE relative to onset	02_Decrease_terrigenous_grain_size	8.16119	Yes	Kender et al. (2012) Fig. 3	CIE thickness is minimum, because data ends within CIE
6	Well 22/11-N1	North Sea	57.65	1.13	52.807	-0.901635	Deep-marine submarine fan, presumably similar to Well 221/20a-4	06_Deep-marine	Terrigenous	Mudstone, with sandstone within the main body of the CIE, followed by laminated mudstones at the end of the CIE and following	Modest increase in grain size during late onset and main body of CIE	03_Increase_terrigenous_grain_size	49.7461	Yes	Eldrett et al. (2014) Figs. 2 and 3	Very expanded CIE onset relative to main CIE. Erosive surface at base of sand body suggesting that part of CIE body may be missing. CIE recovery is inferred to be condensed or partly eroded.
7	Fur Island	Denmark	56.83	9.01	52.0443	6.10708	Probably outer neritic (100-200m water depth)	05_Shelfal (outer) to slope	Terrigenous	Hemipelagic mudstones and local diatomite	Change from glauconitic silt to finely laminated, non-calcareous clay	02_Decrease_terrigenous_grain_size			Schoon et al. (2015)	CIE is interrupted by a glacially disturbed section, such that the total thickness is not clear
8	Store Bælt	Denmark	55.35	11.0833	50.5933	8.01568	Epicontinental sea (upper bathyal to outer neritic)	05_Shelfal (outer) to slope	Terrigenous	Hemipelagic mudstones and local diatomite	Change from glauconitic silt to finely laminated, non-calcareous clay	02_Decrease_terrigenous_grain_size	6.77615		Schoon et al. (2015) Fig. 3	Complete record of the CIE
9	Well 10	West Siberian Sea	53.5	73.53	51.9204	65.6624	Epicontinental sea	04_Shelfal (inner to middle neritic)	Terrigenous	Sapropelitic unit, very high TOC	Very thin PETM interval, denoted by a sapropelitic unit	02_Decrease_terrigenous_grain_size	0.6	Yes	Frieling et al. (2014) Fig. 2	Base of CIE shown as an unconformity. Few measurements to delineate PETM CIE. PETM thickness taken as thickness of sapropelitic bed that is inferred to represent the PETM
10	Sokolovsky Quarry	Kazakhstan	52.97	63.46	50.636	56.2111	Turgay Straight, a seaway presumed to have connected Tethyan and Boreal oceans. Paleodepth unclear.	04_Shelfal (inner to middle neritic)	Terrigenous						Iakovleva et al. (2001)	No CIE reported
11	Cobham Lignite	UK	51.4	0.41	46.5558	-1.51904	Near-coastal (but freshwater) lacustrine/mire deposit	03_Coastal	Terrigenous						Collinson et al. (2009)	Position of CIE not clear
12	Kallo Borehole	North Sea/Netherlands	51.25	4.27	46.4204	1.98552	Lagoonal	03_Coastal	Terrigenous	Clays and sands	Initial reduction in grain size relative to underlying marine sand, roughly coarsening-upwards	02_Decrease_terrigenous_grain_size	24.5574		Steurbaut et al. (2003) Fig. 8	CIE thickness based on assumption that the PETM extends throughout duration of Tienen Formation deposition
13	Doel Borehold	North Sea/Netherlands	51.24	4.3	46.4106	2.01291	Lagoonal	03_Coastal	Terrigenous	Clays and sands	Initial reduction in grain size relative to underlying marine sand, roughly coarsening-upwards	02_Decrease_terrigenous_grain_size	24.7369		Steurbaut et al. (2003) Fig. 8
14	Vasterival Section, Normandy	France	49.91	0.96	45.0667	-1.01348	Terrestrial (swamp) to tidal flat	03_Coastal	Terrigenous	Lignite interbedded with organic-rich silt and clay, root traces and carbonate nodules (paleosols)		06_No_change	0.488731		Garel et al. (2013) Fig. 3
15	Normandy coast	France	49.53	1.04	44.6869	-0.938831	Freshwater lignite overlain by brackish shelly clay	03_Coastal	Terrigenous	Lignite and silt, with root traces	Increase in lignite deposition relative to underlying paleosols, reflecting an increase in organic carbon deposition. No clear change in siliciclastic grain size.	06_No_change	1.1236		Magioncalda et al. (2001) Fig. 5	Location approximate
16	DSDP Site 549	Atlantic Ocean	49.09	-13.1	44.3521	-13.8689	Deep-marine	06_Deep-marine	Non-terrigenous	Red to buff clay with nannofossil oozes	Increase in clay relative to nannofossil ooze	04_Increase_terrigenous_to_carbonate	2.17477		Ravizza et al. (2001) Fig. 2
17	Anthering	Austria	47.88	13.02	38.7395	12.6121	Bathyal slope deposits	06_Deep-marine	Non-terrigenous						Egger et al. (2005) Fig. 2	No clear definition of CIE separate from Untserberg section
18	Untersberg	Austria	47.72	12.92	38.5923	12.4944	Bathyal slope deposits	06_Deep-marine	Non-terrigenous	Marly claystone and claystone	Marlstone below PETM. Transition to marly claystone and claystone within CIE. Return to marlstone deposition following PETM.	04_Increase_terrigenous_to_carbonate	6.35452		Egger et al. (2005) Fig. 2
19	DSDP Site 401	Bay of Biscay	47.4	-8.81	42.6021	-9.98228	Deep-marine (~2000 m paleo-water depth)	06_Deep-marine	Non-terrigenous	Claystone	Increase in terrigenous clay relative to nannofossil chalk	04_Increase_terrigenous_to_carbonate	1.76768	Yes	Tremolada and Bralower (2004) Fig. 3; Pälike et al. (2014) Fig. 3	Upper PETM is missing (Temolada and Bralower, 2004)
20	Murray Ranch	North Dakota	47.39	-103.25	48.3252	96.1461	Fluvial (paleosols and channel deposits)	01_Fluvial	Terrigenous	Sand and silt	Increase in grain size	03_Increase_terrigenous_grain_size	4.42966		Clechenko et al. (2007) Fig. 8
21	Farmers Butte	North Dakota	46.92	-102.11	51.2644	-82.2512	Fluvial (paleosols and channel deposits)	01_Fluvial	Terrigenous	Sandy mudstone, sandstone, lignite	Lignites and mudstone/claystone transition to sandy mudstone and sandstone (modest increase in grain size) following the CIE onset, followed by deposition of lignite.	03_Increase_terrigenous_grain_size	3.79403		Harrington et al. (2005) Fig. 7
22	Belluno Basin (Cicogna Creek)	Italy	46.06	12.24	37.0274	11.5792	Near-continental, western Tethys Ocean, paleo-depth estimated between 600-1000m and no deeper than 1500 m (Tipple et al., 2011)	06_Deep-marine	Non-terrigenous	Clay-marl unit	Marl below PETM. Clay marl within PETM as at the nearby Forada section.	04_Increase_terrigenous_to_carbonate	3.00995		Krishnan et al. (2015) Fig. 2
23	Belluno Basin (Forada Section)	Italy	46.04	12.07	37.0264	11.4293	Near-continental, western Tethys Ocean, paleo-depth estimated between 600-1000m and no deeper than 1500 m (Tipple et al., 2011)	06_Deep-marine	Non-terrigenous	Clay-marl unit	PETM main body associated with clay marl, which replaces laminated marl and limestone below. Recovery associated with limestone.	04_Increase_terrigenous_to_carbonate	4.32736		Tipple et al. (2011) Fig. 2
24	Possagno	Italy	45.83	11.5	36.8826	10.8976	Near-continental, western Tethys Ocean, paleo-depth estimated between 600-1000m and no deeper than 1500 m (Tipple et al., 2011)	06_Deep-marine	Non-terrigenous	Clay-marl	Transition from marl to clay-rich marl to limestone	04_Increase_terrigenous_to_carbonate	0.43769		Agnini et al. (2006) Fig. 2	Nearby to other sites in Belluno Basin.
25	Clark Fork, Bighorn Basin	Wyoming	44.76	-108.89	50.1203	-90.2495	Fluvial	01_Fluvial	Terrigenous			01_Uncertain	101.709		Fig. 3 of Koch et al. (2003) Fig. 3
26	Polecat Bench, Bighorn Basin	Wyoming	44.76	-108.89	50.1203	-90.2495	Fluvial	01_Fluvial	Terrigenous	Paleosols	No change in grain size	06_No_change	56.3401		Kraus et al. (2015) Fig. 2
27	Aktumsuk	Uzbekistan	44.62	58.33	41.9722	52.6572	Epicontinental seaway	04_Shelfal (inner to middle neritic)	Non-terrigenous	Organic-rich sapropelitic	Deposition of an organic-rich sapropelitic bed (TOC up to 20%)	04_Increase_terrigenous_to_carbonate	1.00643		Gavrilo et al. (2003) Fig. 8
28	Kaurtakapy	Kazakhstan	44.25	52.32	41.2031	46.991	Marginal northeastern Tethys	04_Shelfal (inner to middle neritic)	Uncertain						Bolle and Adatte (2001)	No CIE reported
29	Sand Creek Divide, Bighorn Basin	Wyoming	44.16	-107.85	49.3878	-89.3024	Fluvial (paleosols and channel deposits)	01_Fluvial	Terrigenous					Yes	Kraus and Riggins (2007) Fig. 2b	Only main body of CIE is defined, with "???" on lower and upper limits
30	Highway 16, Bighorn Basin	Wyoming	44.02	-107.73	49.2338	-89.2143	Fluvial	01_Fluvial	Terrigenous	Silt-clay paleosols, sand fluvial channel bodies	Increase in grain size	03_Increase_terrigenous_grain_size	54.4123		Foreman et al. (2014) Fig. 2b
31	Cabin Fork, Bighorn Basin	Wyoming	43.96	-107.65	49.1638	-89.1456	Fluvial	01_Fluvial	Terrigenous	Paleosols	Unclear if there is a lithologic change at this locality	01_Uncertain	57.9044		Wing et al. (2005) Fig. 3
32	Kheu River	Caucasus	43.63	39.5	39.8439	34.9538	Epicontinental seaway	04_Shelfal (inner to middle neritic)	Non-terrigenous	Organic-rich sapropelitic bed (mudstone) overlain by marlstone.	Marlstone overlain by an organic-rich sapropelitic bed (TOC up to 20%). Return to marlstone during recovery.	04_Increase_terrigenous_to_carbonate	2.08499		Dickson et al. (2015) Fig. 2
33	Trabaku Pass	Spain	43.3	-2.48	38.2287	-3.35456	Middle or lower bathyal environment (Canudo et al., 1995)	06_Deep-marine	Non-terrigenous	Claystone	Gray marl and limestone gives way to dark brown shale and red clay during the PETM	04_Increase_terrigenous_to_carbonate			Schmitz et al. (2001)	Trabakua Pass section is very similar to Zumaia
34	Zumaia	Spain	43.3	-2.25	38.2198	-3.14179	Middle or lower bathyal environment (Canudo et al., 1995)	06_Deep-marine	Non-terrigenous	Claystone	Gray marl and limestone gives way to dark brown shale and red clay during the PETM	04_Increase_terrigenous_to_carbonate	4.7619		Schmitz et al. (2001) Fig. 3
35	Orio, Basque Basin	Spain	43.2806	-2.11444	38.1952	-3.0177	Deep-water, turbiditic	06_Deep-marine	Terrigenous	Pebbly sandstones	Increase in grain size relative to underlying sandstones. Overlain by carbonates.	03_Increase_terrigenous_grain_size	20.0663		Pujalte et al. (2015) Fig. 11
36	Ermua	Spain	43.19	2.5	38.3514	0.444062	Base of slope apron, turbiditic	06_Deep-marine	Non-terrigenous	Claystone	Marl and limestone transitions to claystone following a lag	04_Increase_terrigenous_to_carbonate	21.2202		Schmitz et al. (2001) Fig. 3	Upper part of CIE not defined
37	Laminoria section	Spain	42.7792	-2.46667	37.7081	-3.37727	Incised valley (fluvial)	01_Fluvial	Terrigenous	Calcareous claystone, pebbly quartz sand, and silty clay	Interpreted incised valley fill	03_Increase_terrigenous_grain_size	14.6628		Pujalte et al. (2015) Fig. 4	No clear definition of CIE. Thickness is an estimate. Laminoria section shows increasing d13Corg trend which may represent CIE recovery, but onset and post-CIE not recorded
38	Korres section	Spain	42.6986	-2.43639	37.6265	-3.35459	Terrestrial (soil carbonate-bearing calcareous clays)	04_Shelfal (inner to middle neritic)	Non-terrigenous	Terrigenous calcareous clays with soil carbonate nodules	Interpreted terrestrial deposition within an otherwise limestone-dominated succession				Pujalte et al. (2015) Fig. 4	No C-isotope data available. PETM tenatively interpreted to coincide with terrestrial claystone that overlies subaerially exposed platform carbonates
39	Dzhengutay	Dagestan	42.69	47.24	39.3351	42.3509	Epicontinental seaway	04_Shelfal (inner to middle neritic)	Non-terrigenous	Mudstone and organic-rich mudstone	Change from marlstone to mudstone and organic-rich and mudstone within PETM. Recovery associated with return to marlstone.	04_Increase_terrigenous_to_carbonate	1.70423		Dickson et al. (2015) Fig. 2
40	Tozal del Cebollar	Spain	42.66	-0.12	37.502	-1.21147	Shallow marine carbonate shelf/braid delta	04_Shelfal (inner to middle neritic)	Non-terrigenous	Coarse-grained sandstones and foraminferal limestones	Transition from linestone to foraminferal bioclastic packstones (marl) and sandstone followed by a return to limestone	04_Increase_terrigenous_to_carbonate	17.7615		Pujalte et al. (2016) Fig. 14	Note that the CIE is not identified in the siliciclastic La Pardina Formation, but this unit is believed to be PETM-related due to interfingering with fine-grained facies present basinward. Location approximate
41	Brecha de Arazas	Spain	42.62	0.03	37.4568	-1.075	Shallow marine carbonate shelf/braid delta	04_Shelfal (inner to middle neritic)	Non-terrigenous	Coarse-grained sandstones and foraminferal limestones	Transition from linestone to foraminiferal limestone and sandstone followed by a return to limestone	04_Increase_terrigenous_to_carbonate	25.2929		Pujalte et al. (2016) Fig. 14	Note that the CIE is not identified in the siliciclastic La Pardina Formation, but this unit is believed to be PETM-related due to interfingering with fine-grained facies present basinward. Location approximate
42	Campo, Tremp Basin	Spain	42.39	0.37	37.2152	-0.773815	Neritic	04_Shelfal (inner to middle neritic)	Terrigenous	Sandstone and lutites	Influx of sand over pre-PETM shale	03_Increase_terrigenous_grain_size	4.42051		Pujalte et al. (2015) Fig. 2
43	Berganuy, Tremp Basin	Spain	42.26	0.68	37.0746	-0.494204	Mudstone-dominated alluvial, abundant paleosols	01_Fluvial	Terrigenous	Conglomerate (base) followed by yellow-orange paleosols	Conglomerate associated with the basal PETM	03_Increase_terrigenous_grain_size	19.3315		Schmitz and Pujalte (2007) Fig. 3
44	Esplugafreda, Tremp Basin	Spain	42.25	0.8	37.0605	-0.383589	Mudstone-dominated alluvial, abundant paleosols	01_Fluvial	Terrigenous	Conglomerate (base) followed by yellow-orange paleosols	Conglomerate associated with the basal PETM	03_Increase_terrigenous_grain_size	27.7049		Schmitz and Pujalte (2003) Fig. 2
45	Hanna Draw Road, Hanna Basin	Wyoming	41.97	-106.52	47.0525	-88.4992	Fluvial	01_Fluvial	Terrigenous	Mudstone to very coarse sandstone	Increase in grain size	03_Increase_terrigenous_grain_size	150.197		Dechesne et al. (2020) Fig. 4; Nace and Spencer (2019) Fig. 2	Onset and recovery not differentiated
46	Piceance Creek	Colarado	40.08	-108.24	45.4329	-90.8455	Fluvial (paleosols and channel deposits)	01_Fluvial	Terrigenous	Clay, silt, medium sand	Increase in grain size	03_Increase_terrigenous_grain_size	41.5149		Foreman et al. (2012) Fig. 2	CIE onset and recovery not labeled
47	Wilson Lake	New Jersey	39.65	-75.05	39.919	-56.941	Shallow marine - shelf	04_Shelfal (inner to middle neritic)	Terrigenous	Clay	Decrease in grain size. Change from Glauconitic fine-medium sand to clay.	02_Decrease_terrigenous_grain_size	13.5221	Yes	Stassen et al. (2012) Fig. 3
48	Ancora	New Jersey	39.64	-74.84	39.8754	-56.7376	Shallow marine - shelf	04_Shelfal (inner to middle neritic)	Terrigenous	Clay	Decrease in grain size. Change from Glauconitic fine-medium sand to clay.	02_Decrease_terrigenous_grain_size	12.1274	Yes	Stassen et al. (2012) Fig. 3
49	Bass River	New Jersey	39.6	-74.43	39.7705	-56.3463	Shallow marine - shelf	04_Shelfal (inner to middle neritic)	Terrigenous	Clay	Decrease in grain size. Change from Glauconitic fine-medium sand to clay.	02_Decrease_terrigenous_grain_size	10.1113	Yes	Stassen et al. (2012) Fig. 3
50	Axehandle Canyon	Utah	39.41	-111.7	44.7933	-93.4856	Fluvial (paleosols and channel deposits)	01_Fluvial	Terrigenous	Mudstone, siltstone, and sandstone	No clear change in grain size	06_No_change	19.8142		Bowen and Bowen (2008) Fig. 2; VanDeVelde et al. (2013) Fig. 1
51	Ephraim Canyon	Utah	39.34	-111.55	45.1476	-94.5929	Palustrine and lacustrine (limestone and dolostone)	02_Lacustrine	Non-terrigenous							Specific location of PETM is uncertain
52	Cove Mountain	Utah	39.23	-111.47	45.0287	-94.5328	Palustrine and lacustrine (limestone and dolostone)	02_Lacustrine	Non-terrigenous							Specific location of PETM is uncertain
53	South Dover Bridge	Maryland	38.73	-76	39.1717	-58.1225	Shallow marine - shelf (inner to middle neritic, <40-50 m depth)	04_Shelfal (inner to middle neritic)	Terrigenous	Clay	Decrease in grain size	02_Decrease_terrigenous_grain_size	16.8241		Self-Trail et al. (2012) Fig. 5
54	Caravaca	Spain	38.1	-1.86	33.0116	-3.10322	Upper bathyal to outer neritic (200-600 m)	05_Shelfal (outer) to slope	Non-terrigenous	Dark gray laminated shale	Marl and limestone transitions to dark gray laminated shale in the PETM	04_Increase_terrigenous_to_carbonate	8.61391	Yes	Canudo et al. (1995) Fig. 5	Parts of zones P4-P6 inferred to be missing
55	Guru-Fatima	Tajikistan	38	69	36.1673	63.7617	Epicontinental seaway	04_Shelfal (inner to middle neritic)	Non-terrigenous	Organic-rich mudstone overlain by laminated mudstone	Change from marlstone to organic-rich and laminated mudstone within PETM. Recovery associated with a return to marlstone.	04_Increase_terrigenous_to_carbonate	3.14815		Dickson et al. (2015) Fig. 2
56	Kurpai/Tadjik Depression	Kurpai	38	69	36.1673	63.7617	Epicontinental seaway (based on proximity to nearby Guru-Fatima)	04_Shelfal (inner to middle neritic)	Non-terrigenous						Gavrilov et al. (1997, 2003)	No CIE reported
57	Alamedilla	Spain	37.5	3.2	32.2368	1.60796	1000-2000m water depth	06_Deep-marine	Non-terrigenous	Claystone	Increase in clay relative to marl during the CIE	04_Increase_terrigenous_to_carbonate	2.48299		Lu et al. (1998) Fig. 13
58	Lodo Gulch	California	36.58	-120.63	41.2512	-100.573	Outer shelf or slope (neritic to bathyal, <200m to ~600 m depth)	05_Shelfal (outer) to slope	Terrigenous	Claystone and siltstone	Decrease in grain size	02_Decrease_terrigenous_grain_size	14.6334		John et al. (2008) Fig. 3
59	Tumey Gulch	California	36.53	-120.63	41.2015	-100.579	Shelf edge or upper slope (bathyal)	05_Shelfal (outer) to slope	Terrigenous		Modest decrease in grain size	02_Decrease_terrigenous_grain_size	25.9126		John et al. (2008) Fig. 4	CIE has modeslty less sand than underlying ~30m.
60	Elles Section	Tunisia	35.86	9.45	27.2733	7.26046	Open marine (possibly neritic?), connected to Tethys	04_Shelfal (inner to middle neritic)	Terrigenous	Silty marl	Increase in silt deposition relative to shale and marl, reflecting increased detrital input	03_Increase_terrigenous_grain_size	2.99346		Crouch et al. (2003) Fig. 4	CIE not very clear, but IETM labeled by dashed line. Depositional setting not entirely clear, beyond open marine
61	Sidi Nasseur	Tunisia	35.74	8.45	27.2779	6.33801	Shallow marine (middle to inner neritic, open marine)	04_Shelfal (inner to middle neritic)	Terrigenous	Shale and marl	Shale before, increasing CaCO3 content during PETM CIE	05_Decrease_terrigenous_to_carbonate	5.84089	Yes	Stassen et al. (2012) Fig. 3	CIE recovery not shown, and presumed top of PETM truncated by unconformity.
62	Forum Selja	Southern Tunisia	34.32	6.32	26.1463	4.16215	Tethys (exactly water depth uncertain, but presumed shelfal)	04_Shelfal (inner to middle neritic)	Uncertain						Bolle and Adatte (2001)	No clear definition of the CIE
63	Beigou, Nanyang	China	32.73	111.46	32.4709	104.871	Lacustrine (deep lake)	02_Lacustrine	Non-terrigenous	Marl and calcareous mudstone	Increase in terrigenous mud	04_Increase_terrigenous_to_carbonate	20.5157		Chen et al. (2016) Fig. 5
64	ODP Site 1209	Shatsky Rise	32.65	158.51	23.5227	-171.036	Paleodepth of 2000 m	06_Deep-marine	Non-terrigenous	Calcareous ooze	Change from light calcareous ooze (~95% carbonate) to dark calcareous ooze (80% carbonate)	04_Increase_terrigenous_to_carbonate	0.565979		Kaiho et al. (2006) Fig. 2	Upper limit of the CIE is queried
65	ODP Site 1210	Shatsky Rise	32.5	158.5	23.3741	-171.06	Paleodepth of 2160 m	06_Deep-marine	Non-terrigenous	Calcareous ooze	Change from light calcareous ooze (~95% carbonate) to dark calcareous ooze (80% carbonate)	04_Increase_terrigenous_to_carbonate	0.54		Kaiho et al. (2006) Fig. 2	Upper limit of the CIE is queried
66	Harrell Core	Gulf Coast, US	32.36	-88.68	34.9481	-72.364	Coastal (estuarine and lagoonal)	03_Coastal	Terrigenous	Glauconitic sands and silts	Modest increase in grain size	03_Increase_terrigenous_grain_size	3.07509	Yes	Sluijs et al. (2014) Fig. 3	Note CIE thickness is a minimum as bounded above and below by unconformities
67	ODP Site 1211	Shatsky Rise	32.22	158.5	23.0953	-171.088	Paleodepth of ~2000 m based on correlation to nearby ODP sites	06_Deep-marine	Non-terrigenous	Calcareous ooze		04_Increase_terrigenous_to_carbonate	0.1	Yes	Colosimo et al. (2005) Fig. F8	CIE thickness of ~0.1 m; seems truncated relative to ODP 1210 and 1209
68	Bear Creek, Alabama	Gulf Coast	31.95	-87.64	34.3821	-71.4044	Shallow marine/estuarine	03_Coastal	Terrigenous						Harrington and Kemp (2001)	No CIE reported
69	Slocum oil field	Texas Gulf Coast	31.64	-95.48	35.2865	-79.457	Shallow marine/deltaic	03_Coastal	Terrigenous			03_Increase_terrigenous_grain_size	26.7858		Sharman et al. (2022)
70	Oakwood Salt Dome	Texas Gulf Coast	31.53	-95.96	35.2505	-79.9737	Shallow marine/deltaic	03_Coastal	Terrigenous			03_Increase_terrigenous_grain_size	12.7401		Sharman et al. (2022)
71	Zomet Telalim	Israel	31.46	34.43	20.5287	28.9557	Minimum depth of deposition ~500m (Bolle et al., 2000)	05_Shelfal (outer) to slope	Non-terrigenous	Calcareous mudstone and marl	PETM associated with a modest increase in calcite and slight drop in quartz and phyllosilicate conent	05_Decrease_terrigenous_to_carbonate	0.63063		Bolle et al. (2000a) Fig. 5
72	Ben Gurion	Israel	31.43	34.48	20.4936	28.9969	Between 500-700 m water depth (Bolle et al., 2000)	05_Shelfal (outer) to slope	Non-terrigenous	Calcareous mudstone and calcareous marl	PETM associated with a strong increase in carbonate abundance (to 90%)	05_Decrease_terrigenous_to_carbonate	1.35204		Bolle et al. (2000a) Fig. 5
73	Bastrop	Texas Gulf Coast	30.07	-97.29	34.0115	-81.6497	Shallow marine transgression over a broad shelf	03_Coastal	Terrigenous						Demchuk et al. (2019)	PETM is associated with a ~1m dark band on basis of Apectodinium acme. No definition of CIE.
74	ODP Site 1051B, Blake Nose	Eastern United States	30.06	-76.36	30.7266	-60.5487	Open marine	06_Deep-marine	Non-terrigenous	Succession generally composed of nannofossil chalk, siliceous ooze, and claystone		01_Uncertain	0.653543		Bains et al. (1999) Fig. 1	Little lithologic information provided
75	Big Bend National Park	Western Texas	29.44	-103.17	34.2427	-87.8571	Fluvial (paleosols and channel deposits)	01_Fluvial	Terrigenous						White and Schiebout et al. (2008)	Position of CIE is unclear
76	Abu Zenima	Egypt	29.07	33.16	18.2966	27.4816	Bathyal (500-600m)	06_Deep-marine	Non-terrigenous	Silty marl and dark brown laminated silty claystone	Marl before and after PETM, increase in silt and clay relative to carbonate during PETM	04_Increase_terrigenous_to_carbonate	0.818187	Yes	Khozyem et al. (2013) Fig. 4	Lower part of PETM missing
77	Gebel Matulla	Egypt	29.05	33.17	18.2756	27.4881	Upper bathyal (~500m)	06_Deep-marine	Non-terrigenous	Marl	Decrease in calcite to 4% and associated increase in phyllosilicates, quartz, and potassic feldpsar	04_Increase_terrigenous_to_carbonate	0.267761		Bolle et al. (2000b) Fig. 9
78	Fredericksburg	Gulf of Mexico	28.4886	-87.8179	31.0061	-72.3312	Water depth deepens to middle shelf during/after the PETM	04_Shelfal (inner to middle neritic)	Non-terrigenous		Lithologies during the latest Paleocene and earliest Eocene are generally limestone and marl, with the abundance of marl increasing in the Eocene. The specific location of the PETM is not clear, thus lithologic change is uncertain	01_Uncertain	9.1		Cunningham et al. (2022) Table S1, Fig. 6	Thickness based on calcareous nannofossil event and excursion taxa; CIE not available. Considered semi-reliable PETM pick.
79	Cheyenne	Gulf of Mexico	27.5444	-87.7651	30.0687	-72.4723	Deep-water submarine fan	06_Deep-marine	Non-terrigenous			01_Uncertain	18.3		Cunningham et al. (2022) Table S1	Thickness based on calcareous nannofossil event and excursion taxa; CIE not available. Considered reliable PETM pick.
80	Shenzi 4	Gulf of Mexico	27.3268	-90.1107	30.2195	-74.8865	Deep-water submarine fan	06_Deep-marine	Terrigenous			01_Uncertain	9.1		Cunningham et al. (2022) Table S1	Thickness based on calcareous nannofossil event and excursion taxa; CIE not available. Considered reliable PETM pick.
81	Anchor 3	Gulf of Mexico	27.18	-91.24	30.2492	-76.0603	Deep-water turbidites	06_Deep-marine	Terrigenous	Organic-lean and calcareous claystone (CIE body) followed by a return to silty turbidites (CIE recovery)	Decrease in terrigenous grain size, following a lag, during the main CIE. Resumption of background facies during CIE recovery.	02_Decrease_terrigenous_grain_size	13.4112		Zarra et al., 2019; this study
82	Mad Dog Deep 2	Gulf of Mexico	27.1445	-90.2678	30.0643	-75.0822	Deep-water submarine fan	06_Deep-marine	Terrigenous			01_Uncertain	8.2		Cunningham et al. (2022) Table S1	Thickness based on calcareous nannofossil event and excursion taxa; CIE not available. Considered semi-reliable PETM pick.
83	Turtle Lake	Gulf of Mexico	27.1299	-91.3874	30.2226	-76.2199	Deep-water submarine fan	06_Deep-marine	Terrigenous			01_Uncertain	9.7		Cunningham et al. (2022) Table S1	Thickness based on calcareous nannofossil event and excursion taxa; CIE not available. Considered reliable PETM pick.
84	Hengyang Basin	China	27.08	111.95	27.4526	107.909	Floodplain	01_Fluvial	Terrigenous	Brick-red to tan sandstones and mudstones	Unclear, as no log or description provided	01_Uncertain	46.1261		Bowen et al. (2002) Science
85	Yucatan North 3	Gulf of Mexico	26.8691	-91.5666	29.9932	-76.4537	Deep-water submarine fan	06_Deep-marine	Terrigenous			01_Uncertain	44.5		Cunningham et al. (2022) Table S1	Thickness based on calcareous nannofossil event and excursion taxa; CIE not available. Considered reliable PETM pick.
86	Baja 2	Gulf of Mexico	26.405	-94.5121	29.9841	-79.5404	Deep-water submarine fan	06_Deep-marine	Terrigenous			01_Uncertain	131.1		Cunningham et al. (2022) Table S1	Thickness based on calcareous nannofossil event and excursion taxa; CIE not available. Considered semi-reliable PETM pick.
87	Bass	Gulf of Mexico	26.3712	-92.7457	29.683	-77.7492	Deep-water submarine fan	06_Deep-marine	Terrigenous			01_Uncertain	18.3		Cunningham et al. (2022) Table S1	Thickness based on calcareous nannofossil event and excursion taxa; CIE not available. Considered reliable PETM pick.
88	Sardinia	Gulf of Mexico	26.3	-92.9114	29.6381	-77.9315	Deep-water submarine fan	06_Deep-marine	Terrigenous			01_Uncertain	42.7		Cunningham et al. (2022) Table S1	Thickness based on calcareous nannofossil event and excursion taxa; CIE not available. Considered semi-reliable PETM pick.
89	ODP Site 1215	Equatorial Pacific	26	147.9	17.8752	178.392	Open marine, near or below the lysocline	06_Deep-marine	Non-terrigenous	Clayey calcareous ooze	Drop in carbonate content (<10%) from 60-80% during the PETM	04_Increase_terrigenous_to_carbonate	0.787487		Leon-Rodriguez et al. (2010) Fig. 4
90	Logan	Gulf of Mexico	25.9805	-91.8432	29.1601	-76.9092	Deep-water submarine fan	06_Deep-marine	Terrigenous	Siliciclatic shale, siltstone, and sandstone	Increase in shale deposition after a lag during the CIE main body. Resumption of shale and sand deposition during CIE recovery.	02_Decrease_terrigenous_grain_size	195		Vimpere et al. (2023) Fig. 2; Cunningham et al. (2022) Table S1	Cunningham interpreted a PETM thickness (221.6 m) based on calcareous nannofossil event and excursion taxa; CIE not available. Considered reliable PETM pick.
91	Dababiya	Egypt	25.5	32.52	14.8195	27.1536	Outer(most) neritic (175 to 200 m water depth)	05_Shelfal (outer) to slope	Terrigenous	Shale and calcareous shale with P-nodules	Change from calcareous shale to laminated shale during CIE onset and then return to calcareous shale above	02_Decrease_terrigenous_grain_size	3.15612		Schulte et al. (2011) Fig. 4; see also Dupuis et al. (2003) and Aubry et al. (2007)
92	Khasi Hills	India	25.28	91.71	-8.73245	79.6759	Marginal coastal marine setting	03_Coastal	Terrigenous	Shale	Little obvious change across the CIE (section is dominated by shale)	06_No_change	0.510753		Prasad et al. (2006) Fig. 4
93	Gebel Duwi	Egypt	25.25	32.75	14.5558	27.3501	Middle neritic (70-100 m water depth)	04_Shelfal (inner to middle neritic)	Non-terrigenous	Shale	Switch from marly-shale to shale	04_Increase_terrigenous_to_carbonate	0.340708		Bolle et al. (2000b) Fig. 4
94	Valia	Western India	21.57	73.16	-7.27303	62.1602	Lagoonal with marine incursion horizons	03_Coastal	Terrigenous	Glauconite-bearing gray shale and lignitic coal	PETM overlies Deccan flood basalt basement	01_Uncertain	8.79617		Samanta et al. (2013) Fig. 8	Valia is located ~20 km NE of Vastan locality
95	ODP Expedition 364 Site M0077	Chixulub impact crater, Yucatán, Mexico	21.4502	-89.9494	24.6309	-75.1066	Pelagic and outer-platform deposition in water depths of 600-700 m	06_Deep-marine	Non-terrigenous	Laminated black shale	Change from limestone to laminated black shale (CIE) back to limestone (post-CIE)	04_Increase_terrigenous_to_carbonate	0.209581		Smith et al. (2020) Fig. 2
96	Vastan	Western India	21.44	73.12	-7.37974	62.0765	Lagoonal with marine incursion horizons	03_Coastal	Terrigenous	Grey shale and lignitic shale	PETM seems to be associated with a modest decrease in grain size (grey shale and lignitic shale) replacing sandy silt	02_Decrease_terrigenous_grain_size	39.2858		Samanta et al. (2013) Fig. 8
97	Yax-1 core	Yucatán, Mexico	20.6704	-89.9267	23.8589	-75.2292	Deep-water, downslope environments	06_Deep-marine	Non-terrigenous	Carbonate wackestone and packstone	No clear change based on stratigraphic log	06_No_change	15.0327		Whalen et al. (2013) Fig. 3	Cored lithologies are not dominantly terrigenous, but rather are carbonates
98	ODP Site 865	Allison Guyot	18.43	-179.55	8.26101	-151.314	Upper half of lower bathyal (1300-1500 m)	06_Deep-marine	Non-terrigenous	Foraminiferal nannofossil ooze	No change in lithology shown on log in Fig. 11	06_No_change	1.64482		Bralower et al. (1995) Fig. 11
99	ODP Site 1001	Nicaragua Rise	15.75	-74.92	15.3554	-71.9511	Open ocean (pelgaic). Uncertain paleo-water depth.	06_Deep-marine	Non-terrigenous	Claystone	Chalk before and after PETM which is represented by a claystone	04_Increase_terrigenous_to_carbonate	1.31443		Bralower et al. (1997) Fig. 4
100	ODP Site 999	Colombia Basin	12.75	-78.73	12.7098	-76.0271	Open ocean (pelgaic). Uncertain paleo-water depth.	06_Deep-marine	Non-terrigenous	Claystone	Chalk before and after PETM which is represented by a claystone	04_Increase_terrigenous_to_carbonate	0.203233		Bralower et al. (1997) Fig. 3
101	ODP Site 1221	Equatorial Pacific	12.03	-143.7	3.10923	-116.388	Deep-water, abyssal plain	06_Deep-marine	Non-terrigenous	Multicolored clay-rich unit	Transition from calcareous chalk to a clay-rich unit during the PETM, followed by a return to calcareous chalk	04_Increase_terrigenous_to_carbonate	0.670589		Raffi et al. (2005) Fig. 4
102	Mar2X	Venezuela	11.06	-72.17	8.61495	-59.7792	Fluvial to coastal plain	01_Fluvial	Terrigenous	Mudstone and sandstone	No interpreted change	06_No_change	32.6848		Jaramillo et al. (2010) Fig. 2
103	Riecito Mache	Venezuela	10.74	-72.37	8.30135	-59.9879	Fluvial to coastal plain	01_Fluvial	Terrigenous	Mudstone and sandstone	No interpreted change	06_No_change	78.093		Jaramillo et al. (2010) Fig. 3
104	ODP Site 1220B	Equatorial Pacific	10.18	-142.75	1.34976	-115.294	Deep-water, abyssal plain	06_Deep-marine	Non-terrigenous	Multicolored clay-rich unit	Transition from nannofossil chalk to clay, followed by a return to calcareous and nannofossil chalk	04_Increase_terrigenous_to_carbonate	0.682927		Raffi et al. (2005) Fig. 4
105	ODP Site 1258	Demerara Rise	9.43	-54.73	6.56245	-42.5121	Paleodepth of ~2500 m	06_Deep-marine	Non-terrigenous	Green claystone	Foraminifer nannofossil chalk that transitions to a claystone followed by a return to foraminifer nannofossil chalk	04_Increase_terrigenous_to_carbonate	2.79612		Pälike et al. (2014) Fig. 2
106	ODP Site 1259	Demerara Rise	9.3	-54.2	6.42357	-41.988	~2500 m paleowater depth (based off of ODP 1258 which is nearby, Palike et al., 2014)	06_Deep-marine	Non-terrigenous	Dark-green clay	Transition from chalk to dark-gray clay, associated with dissolution	04_Increase_terrigenous_to_carbonate	1.88954		Jiang and Wise (2006) Fig. 2
107	ODP Site 1260	Demerara Rise	9.27	-54.54	6.39926	-42.3262	~2500 m paleowater depth (based off of ODP 1258 which is nearby, Palike et al., 2014)	06_Deep-marine	Non-terrigenous	Greenish-gray clay and clayey nannofossil chalk	Nannofossil-foraminfera chalk that transitions to clay and clayey chalk during the early PETM before returning to chalk	04_Increase_terrigenous_to_carbonate	0.462725		Mutterlose et al. (2007) Fig. 3
108	ODP Site 871, Limalok Guyot	Equatorial Pacific	5.5	172.33	-4.41079	-159.667	Shallow water carbonate platform (open ocean atoll)	04_Shelfal (inner to middle neritic)	Non-terrigenous	Packstone-grainstone that transitions to foraminferal wackstone	Decrease in carbonate grain size during the PETM. However, no increase in clastic sediment.	06_No_change	0.461729	Yes	Robinson et al. (2011) Fig. 1	CIE is interpreted to "most likely represents part of the PETM CIE".
109	Bogota Basin	Colombia	4.52	-74.15	2.14155	-61.9604	Paleosols (fluvial)	01_Fluvial	Terrigenous						Morón et al. (2013)	Morón et al. (2013) notes that chronology is insufficient for PETM CIE definition
110	Tanzania Drilling Program	Tanzania	-9.27	39.5	-20.0463	31.5144	Outer shelf to slope bathyal environment (water depths >300 m). Proximity to continent (~70 km from shoreline)	05_Shelfal (outer) to slope	Terrigenous	Claystone & siltstone, minor sandstone	Claystone below PETM and during basal event. Increase in grain size during mid-to late-PETM, followed by a return to claystone. Interpreted increased sediment dilution.	03_Increase_terrigenous_grain_size	11.0145	Yes	Aze et al. (2014) Fig. 1
111	DSDP Site 213	Indian Ocean	-10.21	93.9	-32.1964	77.8095	Indian Ocean. Paleowater depth uncertain.	06_Deep-marine	Non-terrigenous	Claystone	PETM overlies basement. Post-CIE is nannofossil ooze.	04_Increase_terrigenous_to_carbonate	0.314517	Yes	Tremolada and Bralower (2004) Fig. 4	PETM overlies basement
112	DSDP Site 530	Angola Basin	-19.18	9.38	-27.2206	-0.788027	Interbedded mudstones, marlstones, and chalk	06_Deep-marine	Non-terrigenous						Robert and Chamley (1991)	No C-isotopic data
113	ODP Site 762C	Exmouth Plateau	-19.8872	112.254	-44.9158	97.9849	Open marine	06_Deep-marine	Non-terrigenous						Shamrock et al. (2012)	No detail provided on PETM CIE or lithology
114	ODP Site 1262	Walvis Ridge	-27.19	1.58	-33.9248	-10.5534	3600 m paleowater depth (Chun et al., 2010)	06_Deep-marine	Non-terrigenous	Calcareous clay	Calcareous ooze (?) replaced by calcareous claystone during PETM	04_Increase_terrigenous_to_carbonate	0.891304		Raffi et al. (2009) Fig. 3	CIE recovery not as clearly indicated as it is with ODP 1263
115	ODP Site 1263	Walvis Ridge	-28.53	2.78	-35.4366	-9.58412	1500 m paleowater depth (Chun et al., 2010)	06_Deep-marine	Non-terrigenous	Calcareous clay	Calcareous ooze (?) replaced by calcareous claystone during PETM	04_Increase_terrigenous_to_carbonate	2.48913		Zachos et al. (2005) Fig. 3; see also Raffi et al. (2009) Fig. 3	Includes both "core" and recovery interval
116	ODP Site 1266	Walvis Ridge	-28.54	2.34	-35.3753	-10.0525	2600 m paleowater depth (Chun et al., 2010)	06_Deep-marine	Non-terrigenous	Calcareous clay	Calcareous ooze (?) replaced by calcareous claystone during PETM	04_Increase_terrigenous_to_carbonate	1.5		Zachos et al. (2005) Fig. 2.	Onset CIE to H correlation
117	Tawanui	New Zealand	-40.38	176.38	-51.4514	-170.2	Upper middle bathyal water depths (500-1000m), but relatively close to land	06_Deep-marine	Terrigenous	Dark gray, calcareous siltstone	Siltstone before and during main phase of CIE. Decrease in carbonate content by 5-10% during PETM. Increase in sand content post-CIE?	06_No_change	0.957305		Crouch et al. (2003b: Paleo) Fig. 3	Includes units B-D, that include onset, main body, and recovery
118	Mead Stream	New Zealand	-41.96	173.79	-53.8426	-171.455	Upper continental slope	05_Shelfal (outer) to slope	Non-terrigenous	Marl to marly limeestone to limestone, with increase carbonate content upwards	Limestone to marl and marly limeestone during the main PETM, followed by a return to limestone in CIE recovery and post-CIE	04_Increase_terrigenous_to_carbonate	2.85973		Nicolo et al. (2010) Fig. 2
119	Dee Stream	New Zealand	-42	173.74	-53.8965	-171.469	Upper continental slope	05_Shelfal (outer) to slope	Non-terrigenous	Marl to marly limeestone to limestone, with increase carbonate content upwards	Limestone to marl and marly limeestone during the main PETM, followed by a return to limestone in CIE recovery and post-CIE	04_Increase_terrigenous_to_carbonate	2.01493		Nicolo et al. (2010) Fig. 3
120	Kumara-2	New Zealand	-42.58	171.2	-55.4212	-173.617	PETM is marine, but surrounding units are backswamp, over-bank, and channel-fill deposits	03_Coastal	Terrigenous	Non-calcareous mudstone	Non-calcareous shale and mudstone with interbedded coal and silt/sand transition into marine mudstone during the PETM. Return to terrestrial deposition (sandstone-dominated) following CIE.	02_Decrease_terrigenous_grain_size	4.85	Yes	Handley et al. (2011) Fig. 2	Thickness taken from abstract. Unconformity truncates CIE.
121	ODP Site 1172	East Tasman Plateau	-43.97	149.93	-64.3813	161.786	Marginal marine (Bijl et al., 2009) or shallow marine (Sluijs et al., 2011) depositional setting, marked runoff from nearby landmass	04_Shelfal (inner to middle neritic)	Terrigenous	Green and gray clay- and siltstones	No log provided. No change in sedimentation rate noted. PETM is noted to be slightly coarser, but not quantified.	03_Increase_terrigenous_grain_size	0.673781		Sluijs et al. (2011) Fig. 3
122	Kakahu	New Zealand, South Island	-51	171.06	-61.4737	-164.366	Coastal (coal bearing)	03_Coastal	Terrigenous						Pole (2010)	No CIE reported
123	ODP Site 1135, Kerguelan Plateau	Southern Ocean	-59.7	84.27	-60.8817	79.0934	Isolated platform in ocean open, relatively shallow water depths (between present day of 1567 m and 600-1200 m in Late Cretaceous)	06_Deep-marine	Non-terrigenous	Carbonate-rich (N90%) nannofossil and foraminiferal ooze	No increase in terrestrial clay, unlike many other deep-marine PETM sections	06_No_change	0.545454		Jiang and Wise (2009) Fig. 2
124	ODP Site 738, Kerguelan Plateau	Southern Ocean	-62.71	82.79	-63.899	77.6239	1350 m paleodepth (Palike et al., 2014) or 2000-2500 m (Larrasoana et al., 2012)	06_Deep-marine	Non-terrigenous	White calcareous foraminiferal nannofossil chalk	Decrease from >90% to ~70% CaCO3 during the early PETM	04_Increase_terrigenous_to_carbonate	1.14617		Larrasoaña et al. (2012) Fig. 2
125	ODP Site 690, Maud Rise	Southern Ocean	-65.16	1.2	-65.572	-7.00914	2100 m paleodepth (Palike et al., 2014)	06_Deep-marine	Non-terrigenous	Nanno-fossil ooze	Increase in kaolinite (Robert and Chamley, 1991)	04_Increase_terrigenous_to_carbonate	2.26087		Zachos et al. (2005), Fig. 2; see also Kennet and Stott (1991)	Onset CIE to H correlation
References
Agnini, C., Muttoni, G., Kent, D. V., and Rio, D., 2006, Eocene biostratigraphy and magnetic stratigraphy from Possagno, Italy: The calcareous nannofossil response to climate variability: Earth and Planetary Science Letters, v. 241, p. 815–830, doi:10.1016/j.epsl.2005.11.005.
Aubry, M.-P., Ouda, K., Dupuis, C., Berggren, W.A., Van Couvering, J.A., and the Members of the Working Group on the Paleocene/Eocene Boundary, 2007, The Global Standard Stratotype-section and Point (GSSP) for the base of the Eocene Series in the Dababiya section (Egypt): Episodes, v. 30, p. 271-286.
Aze, T. et al., 2014, Extreme warming of tropical waters during the Paleocene-Eocene thermal maximum: Geology, v. 42, p. 739–742, doi:10.1130/G35637.1.
Bains, S., Corfield, R.M., and Norris, R.D., 1999, Mechanisms of climate warming at the end of the Paleocene, v. 285, p. 724-727.
Bijl, P.K., Schouten, S., Sluijs, A., Reichart, G.-J., Zachos, J.C., and Brinkhuis, H., 20009, Early Paleogene temperature evolution of the southwest Pacific Ocean: Nature, v. 461, p. 776-779.
Bolle, M.P., and Adatte, T., 2001, Palaeocene early Eocene climatic evolution in the Tethyan realm: clay mineral evidence: Clay Minerals, v. 36, p. 249–261, doi:Doi 10.1180/000985501750177979.
Bolle, M.P., Pardo, A., Adatte, T., Von Salis, K., and Burns, S., 2000a, Climatic evolution on the southeastern margin of the Tethys (Negev, Israel) from the Palaeocene to the early Eocene: Focus on the late Palaeocene thermal maximum: Journal of the Geological Society, v. 157, p. 929–941, doi:10.1144/jgs.157.5.929.
Bolle, M.P., Tantawy, A.A., Pardo, A., Adatte, T., Burns, S., and Kassab, A., 2000b, Climatic and environmental changes documented in the upper Paleocene to lower Eocene of Egypt: Eclogae Geologicae Helvetiae, v. 93, p. 33–51.
Bowen, G.J., and Bowen, B.B., 2008, Mechanisms of PETM global change constrained by a new record from central Utah: Geology, v. 36, p. 379-382.
Bowen, G.J., Clyde, W.C., Koch, P.L., Ting, S., Alroy, J., Tsubamoto, T., Wang, Y., and Wang, Y., 2002, Mammalian dispersal at the Paleocene/Eocene boundary: Science, v. 295, p. 2062-2066.
Bralower, T.J., Thomas, D.J., Zachos, J.C., Hirschmann, M.M., Röhl, U., Sigurdsson, H., Thomas, E., and Whitney, D.L., 1997, High-resolution records of the late Paleocene thermal maximum and circum-Caribbean volcanism: Is there a causal link? Geology, v. 25, p. 963–966, doi:10.1130/0091-7613(1997)025<0963:HRROTL>2.3.CO;2.
Bralower, T.J., Zachos, J.C., Thomas, E., Parrow, M., Paull, C.K., Kelly, D.C., Silva, I.P., Sliter, W. V., and Lohmann, K.C., 1995, Late Paleocene to Eocene paleoceanography of the equatorial Pacific Ocean: Stable isotopes recorded at Ocean Drilling Program Site 865, Allison Guyot: Paleoceanography, v. 10, p. 841–865, doi:10.1029/95PA01143.
Canudo, J.I., Keller, G., Molina, E., and Ortiz, N., 1995, Planktic foraminiferal turnover and δ13C isotopes across the Paleocene-Eocene transition at Caravaca and Zumaya, Spain: Palaeogeography, Palaeoclimatology, Palaeoecology, v. 114, p. 75–100, doi:10.1016/0031-0182(95)00073-U.
Chen, Z., Ding, Z., Yang, S., Zhang, C., and Wang, X., 2016, Increased precipitation and weathering across the Paleocene-Eocene Thermal Maximum in central China: Geochemistry Geophysics Geosystems, v. 17, p. 2286–2297, doi:10.1002/2016GC006406.
Clechenko, E.R., Kelly, D.C., Harrington, G.J., and Stiles, C.A., 2007, Terrestrial records of a regional weathering profile at the Paleocene-Eocene boundary in the Williston Basin of North Dakota: Bulletin of the Geological Society of America, v. 119, p. 428–442, doi:10.1130/B26010.1.
Collinson, M.E., Steart, D.C., Harrington, G.J., Hooker, J.J., Scott, A.C., Allen, L.O., Glasspool, I.J., and Gibbons, S.J., 2009, Palynological evidence of vegetation dynamics in response to palaeoenvironmental change across the onset of the Paleocene-Eocene Thermal Maximum at Cobham, Southern England: Grana, v. 48, p. 38–66, doi:10.1080/00173130802707980.
Colosimo, A.B., Bralower, T.J., and Zachos, J.C., 2005, Evidence for lysocline shoaling at the Paleocene/Eocene Thermal Maximum on Shatsky Rise, northwest Pacific: Proceedings of the Ocean Drilling Program: Scientific Results, v. 198, doi:10.2973/odp.proc.sr.198.112.2006.
Crouch, E.M., Brinkhuis, H., Visscher, H., Adatte, T., and Bolle, M.P., 2003a, Late Paleocene-early Eocene dinoflagellate cyst records from the Tethys: Further observations on the global distribution of Apectodinium: Special Paper of the Geological Society of America, v. 369, p. 113–131, doi:10.1130/0-8137-2369-8.113.
Crouch, E.M., Dickens, G.R., Brinkhuis, H., Aubry, M.P., Hollis, C.J., Rogers, K.M., and Visscher, H., 2003b, The Apectodinium acme and terrestrial discharge during the Paleocene-Eocene thermal maximum: New palynological, geochemical and calcareous nannoplankton observations at Tawanui, New Zealand: Palaeogeography, Palaeoclimatology, Palaeoecology, v. 194, p. 387–403, doi:10.1016/S0031-0182(03)0…
Cunningham, R., Phillips, M.P., Snedden, J.W., Norton, I.O., Lowery, C.M., Virdell, J.W., Barrie, C.D., and Avery, A., 2022, Productivity and organic carbon trends through the Wilcox Group in the deep Gulf of Mexico: Evidence for ventilation during the Paleocene-Eocene Thermal Maximum: Marine and Petroleum Geology, doi:10.1016/j.marpetgeo.2022.105634
Dechesne, M., Currano, E.D., Dunn, R.E., Higgins, P., Hartman, J.H., Chamberlain, K.R., and Holm-Denoma, C.S., 2020, A new stratigraphic framework and constraints for the position of the paleocene-eocene boundary in the rapidly subsiding Hanna Basin, Wyoming: Geosphere, v. 16, p. 594–618, doi:10.1130/GES02118.1.
Demchuk, T.D., Denison, C.N., and O'Keefe, J.M.K., 2019, An integrated reevaluation of Wilcox/Carrizo stratigraphy, Bastrop County, Texas: Refined chronostratigraphic and revised paleoenvironments: Geological Problem Solving with Microfossils IV, SEPM Special Publication No. 111, p. 172-185.
Denis, E.H., Pedentchouk, N., Schouten, S., Pagani, M., and Freeman, K.H., 2017, Fire and ecosystem change in the Arctic across the Paleocene–Eocene Thermal Maximum: Earth and Planetary Science Letters, v. 467, p. 149–156, doi:10.1016/j.epsl.2017.03.021.
Dickson, A.J., Cohen, A.S., Coe, A.L., Davies, M., Shcherbinina, E.A., and Gavrilov, Y.O., 2015, Evidence for weathering and volcanism during the PETM from Arctic Ocean and Peri-Tethys osmium isotope records: Palaeogeography, Palaeoclimatology, Palaeoecology, v. 438, p. 300–307, doi:10.1016/j.palaeo.2015.08.019.
Dupuis, C., Aubrey, M.-P.. Steurbaut, E., Berggren, W.A., Ouda, K., Magioncalda, R., Cramer, B.S., Kent, D.V., Speijer, R.P., and Heilmann-Clausen, C., 2003, The Dababiya Quarry Section: Lithostratigraphy, clay mineralogy, geochemistry and paleontology: Micropaleontology, v. 49, p. 41-59.
Dypvik, H., Riber, L., Burca, F., Rüther, D., Jargvoll, D., 2011, The Paleocene-Eocene thermal maximum (PETM) in Svalbard - clay mineral and geochemical signals: Palaeogeography, Palaeoclimatology, and Palaeoecology, v. 302, p.152-169.
Egger, H., Homayoun, M., Huber, H., Rögl, F., and Schmitz, B., 2005, Early Eocene climatic, volcanic, and biotic events in the northwestern Tethyan Untersberg section, Austria: Palaeogeography, Palaeoclimatology, Palaeoecology, v. 217, p. 243–264, doi:10.1016/j.palaeo.2004.12.006.
Eldrett, J.S., Greenwood, D.R., Polling, M., Brinkhuis, H., and Sluijs, A., 2014, A seasonality trigger for carbon injection at the Paleocene-Eocene Thermal Maximum: Climate of the Past, v. 10, p. 759–769, doi:10.5194/cp-10-759-2014.
Foreman, B.Z., 2014, Climate-driven generation of a fluvial sheet sand body at the Paleocene – Eocene boundary in northwest Wyoming (USA): Basin Research, v. 26, p. 225–241, doi:10.1111/bre.12027.
Foreman, B.Z., Heller, P.L., and Clementz, M.T., 2012, Fluvial response to abrupt global warming at the Palaeocene/Eocene boundary: Nature, v. 490, p. 92–95, doi:10.1038/nature11513.
Frieling, J., Iakovleva, A.I., Reichart, G.J., Aleksandrova, G.N., Gnibidenko, Z.N., Schouten, S., and Sluijs, A., 2014, Paleocene-Eocene warming and biotic response in the epicontinental West Siberian Sea: Geology, v. 42, p. 767–770, doi:10.1130/G35724.1.
Garel, S. et al., 2013, Paleohydrological and paleoenvironmental changes recorded in terrestrial sediments of the Paleocene-Eocene boundary (Normandy, France): Palaeogeography, Palaeoclimatology, Palaeoecology, v. 376, p. 184–199, doi:10.1016/j.palaeo.2013.02.035.
Gavrilov, Y.O., Kodina, L.A., Lubchenko, I.Y., and Muzylev, N.G., 1997, The Late Paleocene Anoxic Event in Epicontinental Seas of Peri-Tethys and Formation of the Sapropelite Unit: Sedimentology and Geochemistry: Lithology and Mineral Resources, v. 32, p. 427–450.
Gavrilov, Y.O., Shcherbinina, E.A., and Oberhansli, H., 2003, Paleocene-Eocene boundary events in the northeastern Peri-Tethys: Geological Society of America Special Paper, v. 369, p. 147–168.
Handley, L., Crouch, E.M., and Pancost, R.D., 2011, A New Zealand record of sea level rise and environmental change during the Paleocene-Eocene Thermal Maximum: Palaeogeography, Palaeoclimatology, Palaeoecology, v. 305, p. 185–200, doi:10.1016/j.palaeo.2011.03.001.
Harding, I.C. et al., 2011, Sea-level and salinity fluctuations during the Paleocene-Eocene thermal maximum in Arctic Spitsbergen: Earth and Planetary Science Letters, v. 303, p. 97–107, doi:10.1016/j.epsl.2010.12.043.
Harington, G.J., Clechenko, E.R., and Kelly, D.C., 2005, Palynology and organic-carbon isotope ratios across a terrestrial Palaeocene/Eocene boundary section in the Williston Basin, North Dakota, USA: Palaeogeography, Palaeoclimatology, Palaeoecology, v. 226, p. 214-232.
Harrington, G.J., and Kemp, S.J., 2001, US Gulf Coast vegetation dynamics during the latest Palaeocene: Palaeogeography, Palaeoclimatology, Palaeoecology, v. 167, p. 1–21, doi:10.1016/S0031-0182(00)00228-5.
Iakovleva, A.I., Brinkhuis, H., and Cavagnetto, C., 2001, Late Palaeocene-early Eocene dinoflagellate cysts from the Turgay Strait, Kazakhstan; correlations across ancient seaways: Palaeogeography, Palaeoclimatology, Palaeoecology, v. 172, p. 243–268, doi:10.1016/S0031-0182(01)00300-5.
Jaramillo, C. et al., 2010, Effects of rapid global warming at the Paleocene-Eocene boundary on neotropical vegetation: Science, v. 330, p. 957–961, doi:10.1126/science.1193833.
Jiang, S., and Wise, S.W., 2006, Surface-water chemistry and fertility variations in the tropical Atlantic across the Paleocene/Eocene Thermal Maximum as evidenced by calcareous nannoplankton from ODP Leg 207, Hole 1259B: Revue de Micropaleontologie, v. 49, p. 227–244, doi:10.1016/j.revmic.2006.10.002.
Jiang, S., and Wise, S.W., Jr., 2009, Distinguishing the influence of diagenesis on the paleoecological reconstruction of nannoplankton across the Paleocene/Eocene Thermal Maximum: An example from the Kerguelen Plateau, southern Indian Ocean: Marine Micropaleontology, v. 72, p. 49-59.
John, C.M., Bohaty, S.M., Zachos, J.C., Sluijs, A., Gibbs, S., Brinkhuis, H., and Bralower, T.J., 2008, North American continental margin records of the Paleocene-Eocene thermal maximum: Implications for global carbon and hydrological cycling: Paleoceanography, v. 23, p. 1–20, doi:10.1029/2007PA001465.
Kaiho, K., Takeda, K., Petrizzo, M.R., and Zachos, J.C., 2006, Anomalous shifts in tropical Pacific planktonic and benthic foraminiferal test size during the Paleocene-Eocene thermal maximum: Palaeogeography, Palaeoclimatology, Palaeoecology, v. 237, p. 456–464, doi:10.1016/j.palaeo.2005.12.017.
Kender, S., Stephenson, M.H., Riding, J.B., Leng, M.J., Knox, R.W.O.B., Peck, V.L., Kendrick, C.P., Ellis, M.A., Vane, C.H., and Jamieson, R., 2012, Marine and terrestrial environmental changes in NW Europe preceding carbon release at the Paleocene-Eocene transition: Earth and Planetary Science Letters, v. 353–354, p. 108–120, doi:10.1016/j.epsl.2012.08.011.
Kennet, J.P., and Stott, L.D., 1991, Abrupt deep-sea warming, palaeoceanographic changes and benthic extinctions at the end of the Palaeocene: Nature, v. 353, p. 225-229.
Khozyem, H., Adatte, T., Spangenberg, J.E., Tantawy, A.A., and Keller, G., 2013, Palaeoenvironmental and climatic changes during the Palaeocene-Eocene Thermal Maximum (PETM) at the Wadi Nukhul Section, Sinai, Egypt: Journal of the Geological Society, v. 170, p. 341–352, doi:10.1144/jgs2012-046.
Koch, P.L., Clyde, W.C., Hepple, R.P., Fogel, M.L., Wing, S.L., Zachos, J.C., and Anonymous, 2003, Carbon and oxygen isotope records from Paleosols spanning the Paleocene-Eocene boundary, Bighorn Basin, Wyoming; Causes and consequences of globally warm climates in the early Paleogene: Causes and Consequences of Globally Warm Climates in the Early Paleogene, v. 369, p. 49–64.
Kraus, M.J., and Riggins, S., 2007, Transient drying during the Paleocene-Eocene Thermal Maximum (PETM): Analysis of paleosols in the bighorn basin, Wyoming: Palaeogeography, Palaeoclimatology, Palaeoecology, v. 245, p. 444–461, doi:10.1016/j.palaeo.2006.09.011.
Kraus, M.J., Woody, D.T., Smith, J.J., and Dukic, V., 2015, Alluvial response to the Paleocene-Eocene Thermal Maximum climatic event, Polecat Bench, Wyoming (U.S.A.): Palaeogeography, Palaeoclimatology, Palaeoecology, v. 435, p. 177–192, doi:10.1016/j.palaeo.2015.06.021.
Krishnan, S., Pagani, M., and Agnini, C., 2015, Leaf waxes as recorders of paleoclimatic changes during the Paleocene-Eocene Thermal Maximum: Regional expressions from the Belluno Basin: Organic Geochemistry, v. 80, p. 8–17, doi:10.1016/j.orggeochem.2014.12.005.
Larrasoaña, J.C., Roberts, A.P., Chang, L., Schellenberg, S.A., Fitz Gerald, J.D., Norris, R.D., and Zachos, J.C., 2012, Magnetotactic bacterial response to Antarctic dust supply during the Palaeocene-Eocene thermal maximum: Earth and Planetary Science Letters, v. 333–334, p. 122–133, doi:10.1016/j.epsl.2012.04.003.
Lu, G., Keller, G., and Pardo, A., 1998, Stability and change in Tethyan planktic foraminifera across the Paleocene-Eocene transition: Marine Micropaleontology, v. 35, p. 203–233, doi:10.1016/S0377-8398(98)00018-8.
Magioncalda, R., Dupuis, C., Blamart, D., Fairon-Demaret, M., Perreau, M., Renard, M., Riveline, J., Roche, M., and Keppens, E., 2001, L’excursion isotopique du carbone organique (δ13Corg) dans les paleoenvironnements continentaux de l’intervalle Paleocene/Eocene de Varangeville (Haute-Normandie): Bulletin de la Société Géologique de France, v. 172, p. 349–358.
Morón, S., Fox, D.L., Feinberg, J.M., Jaramillo, C., Bayona, G., Montes, C., and Bloch, J.I., 2013, Climate change during the Early Paleogene in the Bogotá Basin (Colombia) inferred from paleosol carbon isotope stratigraphy, major oxides, and environmental magnetism: Palaeogeography, Palaeoclimatology, Palaeoecology, v. 388, p. 115–127, doi:10.1016/j.palaeo.2013.08.010.
Mutterlose, J., Linnert, C., and Norris, R., 2007, Calcareous nannofossils from the Paleocene-Eocene Thermal Maximum of the equatorial Atlantic (ODP Site 1260B): Evidence for tropical warming: Marine Micropaleontology, v. 65, p. 13–31, doi:10.1016/j.marmicro.2007.05.004.
Nace, K., and Spencer, P., 2019, Vegetation structure and lithology response to the Paleocene-Eocene thermal maximum in the Hanna Basin, Wyoming: Short Contributions Keck Geology Consortium, v. 32, p. 1–8, doi:10.18277/akrsg.2019.32.27.
Nicolo, M.J., Dickens, G.R., and Hollis, C.J., 2010, South Pacific intermediate water oxygen depletion at the onset of the Paleocene-Eocene thermal maximum as depicted in New Zealand margin sections: Paleoceanography, v. 25, p. 1–12, doi:10.1029/2009PA001904.
Nøhr-Hansen, H., 2003, Dinoflagellate cyst stratigraphy of the Palaeogene strata from the Hellefisk-1, Ikermiut-1, Kangâmiut-1, Nukik-1, Nukik-2 and Qulleq-1 wells, offshore West Greenland: v. 20, 987–1016 p., doi:10.1016/S0264-8172(02)00116-2.
Pälike, C., Delaney, M.L., and Zachos, J.C., 2014, Deep-sea redox across the Paleocene-Eocene thermal maximum: Geochemistry, Geophysics, Geosystems, v. 15, p. 1038–1053, doi:10.1002/2013GC005074.Received.
Pole, M., 2010, Ecology of paleocene-eocene vegetation at Kakahu,South Canterbury, New Zealand: Palaeontologia Electronica, v. 13, p. 1–29.
Prasad, V., Garg, R., Singh, I.B., and Joachimski, M.M., 2006, Apectodinium acme and palynofacies characteristics in the latest Palaeocene-earliest Eocene of northeastern India: biotic response to the Palaeocene-Eocene thermal maxima (PETM) in low latitude: Journal of the Palaeontological Society of India, v. 51, p. 75–91.
Pujalte, V., Baceta, J.I., and Schmitz, B., 2015, A massive input of coarse-grained siliciclastics in the Pyrenean Basin during the PETM: The missing ingredient in a coeval abrupt change in hydrological regime: Climate of the Past, v. 11, p. 1653–1672, doi:10.5194/cp-11-1653-2015.
Pujalte, V., Robador, A., Payros, A., and Samsó, J.M., 2016, A siliciclastic braid delta within a lower Paleogene carbonate platform (Ordesa-Monte Perdido National Park, southern Pyrenees, Spain): Record of the Paleocene–Eocene Thermal Maximum perturbation: Palaeogeography, Palaeoclimatology, Palaeoecology, v. 459, p. 453–470, doi:10.1016/j.palaeo.2016.07.029.
Raffi, I., Backman, J., and Pälike, H., 2005, Changes in calcareous nannofossil assemblages across the Paleocene/Eocene transition from the paleo-equatorial Pacific Ocean: Palaeogeography, Palaeoclimatology, Palaeoecology, v. 226, p. 93–126, doi:10.1016/j.palaeo.2005.05.006.
Raffi, I., Backman, J., Zachos, J.C., and Sluijs, A., 2009, The response of calcareous nannofossil assemblages to the Paleocene Eocene Thermal Maximum at the Walvis Ridge in the South Atlantic: Marine Micropaleontology, v. 70, p. 201–212, doi:10.1016/j.marmicro.2008.12.005.
Ravizza, G., Norris, R.N., and Blusztajn, J., 2001, As osmium isotope excursion associated with the late Paleocene thermal maximum: Evidence of intensified chemical weathering: Paleoceanography, v. 16, p. 155–163.
Robert, C., and Chamley, H., 1991, Development of early Eocene warm climates, as inferred from clay mineral variations in oceanic sediments: Palaeogeography, Palaeoclimatology, Palaeoecology, v. 89, p. 315–331.
Samanta, A., Bera, M.K., Ghosh, R., Bera, S., Filley, T., Pande, K., Rathore, S.S., Rai, J., and Sarkar, A., 2013, Do the large carbon isotopic excursions in terrestrial organic matter across Paleocene-Eocene boundary in India indicate intensification of tropical precipitation? Palaeogeography, Palaeoclimatology, Palaeoecology, v. 387, p. 91–103, doi:10.1016/j.palaeo.2013.07.008.
Schmitz, B., and Pujalte, V., 2007, Abrupt increase in seasonal extreme precipitation at the Paleocene-Eocene boundary: Geology, v. 35, p. 215–218, doi:10.1130/G23261A.1.
Schmitz, B., and Pujalte, V., 2003, Sea-level, humidity, and land-erosion records across the initial Eocene thermal maximum from a continental-marine transect in northern Spain: Geology, v. 31, p. 689–692, doi:10.1130/G19527.1.
Schmitz, B., Pujalte, V., and Núñez-Betelu, K., 2001, Climate and sea-level perturbations during the Initial Eocene Thermal Maximum: Evidence from siliciclastic units in the Basque basin (Ermua, Zumaia and Trabakua Pass), northern Spain: Palaeogeography, Palaeoclimatology, Palaeoecology, v. 165, p. 299–320, doi:10.1016/S0031-0182(00)00167-X.
Schoon, P.L., Heilmann-Clausen, C., Schultz, B.P., Sinninghe Damsté, J.S., and Schouten, S., 2015, Warming and environmental changes in the eastern North Sea Basin during the Palaeocene-Eocene Thermal Maximum as revealed by biomarker lipids: Organic Geochemistry, v. 78, p. 79–88, doi:10.1016/j.orggeochem.2014.11.003.
Schulte, P., Scheibner, C., and Speijer, R.P., 2011, Fluvial discharge and sea-level changes controlling black shale deposition during the Paleocene-Eocene Thermal Maximum in the Dababiya Quarry section, Egypt: Chemical Geology, v. 285, p. 167–183, doi:10.1016/j.chemgeo.2011.04.004.
Self-Trail, J.M., Powars, D.S., Watkins, D.K., and Wandless, G.A., 2012, Calcareous nannofossil assemblage changes across the Paleocene-Eocene Thermal Maximum: Evidence from a shelf setting: Marine Micropaleontology, v. 92–93, p. 61–80, doi:10.1016/j.marmicro.2012.05.003.
Sharman, G. R., Covault, J. A., Flaig, P. P., Dunn, R., Fussee-Durham, P., Larson, T., Shanahan, T. M., Dubois, K., Shaw, J. B., Crowley, J. L., and Shaulis, B.: Coastal Response to Global Warming During the Paleocene-Eocene Thermal Maximum, journal pre-print, available at SSRN: http://dx.doi.org/10.2139/ssrn.4200185.
Sluijs, A., Bijl, P.K., Schouten, S., Röhl, U., Reichart, G.J., and Brinkhuis, H., 2011, Southern ocean warming, sea level and hydrological change during the Paleocene-Eocene thermal maximum: Climate of the Past, v. 7, p. 47–61, doi:10.5194/cp-7-47-2011.
Sluijs, A., Van Roij, L., Harrington, G.J., Schouten, S., Sessa, J.A., Levay, L.J., Reichart, G.J., and Slomp, C.P., 2014, Warming, euxinia and sea level rise during the Paleocene-Eocene Fhermal Maximum on the Gulf Coastal Plain: Implications for ocean oxygenation and nutrient cycling: Climate of the Past, v. 10, p. 1421–1439, doi:10.5194/cp-10-1421-2014.
Smith, V. et al., 2020, Life and death in the Chicxulub impact crater: A record of the Paleocene-Eocene Thermal Maximum: Climate of the Past, v. 16, p. 1889–1899, doi:10.5194/cp-16-1889-2020.
Stassen, P., Thomas, E., and Speijer, R.P., 2012, Integrated stratigraphy of the Paleocene-Eocene thermal maximum in the New Jersey Coastal Plain: Toward understanding the effects of global warming in a shelf environment: Paleoceanography, v. 27, p. 1–17, doi:10.1029/2012PA002323.
Steurbaut, E., Magioncalda, R., Dupuis, C., Van Simaeys, S., Roche, E., and Roche, M., 2003, Palynology, paleoenvironments, and organic carbon isotope evolution in lagoonal Paleocene-Eocene boundary settings in North Belgium: Geological Society of America Special Paper, v. 369, p. 291–317.
Tipple, B.J., Pagani, M., Krishnan, S., Dirghangi, S.S., Galeotti, S., Agnini, C., Giusberti, L., and Rio, D., 2011, Coupled high-resolution marine and terrestrial records of carbon and hydrologic cycles variations during the Paleocene-Eocene Thermal Maximum (PETM): Earth and Planetary Science Letters, v. 311, p. 82–92, doi:10.1016/j.epsl.2011.08.045.
Tremolada, F., and Bralower, T.J., 2004, Nannofossil assemblage fluctuations during the Paleocene-Eocene Thermal Maximum at Sites 213 (Indian Ocean) and 401 (North Atlantic Ocean): Palaeoceanographic implications: Marine Micropaleontology, v. 52, p. 107–116, doi:10.1016/j.marmicro.2004.04.002.
VanDeVelde, J.H., Bowen, G.J., Passey, B.H., and Bowen, B.B., 2013, Climatic and diagenetic signals in the stable isotope geochemistry of dolomitic paleosols spanning the Paleocene-Eocene boundary: Geochimica et Cosmochimica Acta, v. 109, p. 254–267, doi:10.1016/j.gca.2013.02.005.
Vimpere, L., Spangenberg, J.E., Roige, M., Adatte, T., De Kaenel, E., Fildani, A., Clark, J., Sahoo, S., Bowman, A., Sternal., P., and Castelltort, S.: Carbon isotope and biostratigraphic evidence for an expanded Paleocene-Eocene Thermal Maximum sedimentary record in the deep Gulf of Mexico, Geology, https://doi.org/10.1130/G50641.1, 2023.
Whalen, M.T., Gulick, S.S.P., Pearson, Z.F., Norris, R.D., Cruz, L.P., and Fucugauchi, J.U., 2013, Annealing the Chicxulub impact: Paleogene Yucatan carbonate slope development in the Chicxulub impact basin, Mexcio: SEPM Special Publication, v. 105, p. 282–304.
White, P.D., and Schiebout, J., 2008, Paleogene paleosols and changes in pedogenesis during the initial Eocene thermal maximum: Big Bend National Park, Texas, USA: Bulletin of the Geological Society of America, v. 120, p. 1347–1361, doi:10.1130/B25987.1.
Wieczorek, R., Fantle, M.S., Kump, L.R., and Ravizza, G., 2013, Geochemical evidence for volcanic activity prior to and enhanced terrestrial weathering during the paleocene eocene thermal maximum: Geochimica et Cosmochimica Acta, v. 119, p. 391–410, doi:10.1016/j.gca.2013.06.005.
Wing, S.L., Harrington, G.J., Smith, F. a, Bloch, J.I., Boyer, D.M., and Freeman, K.H., 2005, Transient floral change and rapid global warming at the Paleocene-Eocene boundary: Science, v. 310, p. 993–996.
Zachos, J.C. et al., 2005, Rapid acidification of the ocean during the Paleocean-Eocene Thermal Maximum: Science, v. 308, p. 1611–1615, doi:10.1126/science.1109004.
Zarra, L., Hackworth, R., and Kahn, A., 2019, Wilcox chronostratigraphic framework update: extended abstract from poster presentation given at AAPG 2019 Annual Convention & Exhibition, doi:10.1306/51616Zarra2019
