# Supplementary material for: Carbon isotope chemostratigraphy, geochemistry, and biostratigraphy of the Paleocene–Eocene Thermal Maximum, deepwater Wilcox Group, Gulf of Mexico (USA)
Source: Copernicus journal article supplement (doi:10.5194/cp-19-1743-2023), 2023-09-05
Supplement: Supplementary file 2 [file Table S2 Oil extraction efficiency.xlsx]

## Sheet: Sheet1
Table S2. Estimation of solvent extraction efficiency of two-stroke motor oil
	mg oil added	C (mg)	residual C (mg)	% oil removed
soil_raw	0	0.00805686	0
soil_treated_1	259.8	0.0118823	0.00382539	0.999985
soil_treated_2	259.8	0.0126647	0.0046078	0.999982
soil_treated_3	259.8	0.0140699	0.00601308	0.999977
soil_treated_4	259.8	0.0136012	0.00554437	0.999979
sand_raw	0	0.00244178	0
sand_treated_1	259.8	0.00788546	0.00544368	0.999979
sand_treated_2	259.8	0.00634543	0.00390365	0.999985
sand_treated_3	259.8	0.00983599	0.00739422	0.999972
0.3 cm3 of two-stroke oil (density of 0.866 g/cm3) added per sample
