# Supplementary material for: Carbon isotope chemostratigraphy, geochemistry, and biostratigraphy of the Paleocene–Eocene Thermal Maximum, deepwater Wilcox Group, Gulf of Mexico (USA)
Source: Copernicus journal article supplement (doi:10.5194/cp-19-1743-2023), 2023-09-05
Supplement: Supplementary file 3 [file Table S3 Sample treatment comparison.xlsx]

## Sheet: Sheet1
Table S3. Comparison of %C and d13C values prior to and following solvent extraction
Order	Sample	Depth (ft)	Treatment	%C	d 13C/12C	Lithology
1	15A	31481.8	Raw	3.72467	-24.5781	Indurated, laminated, brown, well-sorted lvf ss
2	15A	31481.8	Solvent	1.20261	-18.1046
3	15A	31481.8	Solvent + Decarb	0.780055	-27.2269
4	56A	31535.7	Raw	3.44839	-24.3923	Indurated, light gray, well-sorted, lvf ss, thin organic wisps along laminations, likely cemented
5	56A	31535.7	Solvent	1.98952	-18.2469
6	56A	31535.7	Solvent + Decarb	0.904212	-26.1628
7	82A	31580	Raw	0.481146	-17.717	Indurated, laminated, dark gray muddy sts, thin laminae of light gray coarse sts
8	82A	31580	Solvent	0.661547	-16.0504
9	82A	31580	Solvent + Decarb	0.482627	-25.3894
10	90A	31585.9	Raw	1.19691	-21.4064	Indurated, dark gray muddy sts, thin laminae of coarse sts
11	90A	31585.9	Solvent	1.29326	-20.9492
12	90A	31585.9	Solvent + Decarb	1.09547	-25.9776
13	102A	31595.8	Raw	1.56864	-21.5881	Indurated, finely laminated, gray ms (clay + silt?)
14	102A	31595.8	Solvent	1.63851	-21.1884
15	102A	31595.8	Solvent + Decarb	1.32482	-25.8328
16	109A	31603.1	Raw	3.11319	-5.84504	Indurated, massive, light gray claystone, fine crystalline texture, disseminated pyrite, local blocky calcite
17	109A	31603.1	Solvent	3.24914	-6.43354
18	109A	31603.1	Solvent + Decarb	0.298421	-20.38
19	141A	31637.5	Raw	0.928576	-21.5276	Fissile, laminated, dark gray silty ms
20	141A	31637.5	Solvent	1.07501	-20.926
21	141A	31637.5	Solvent + Decarb	0.963078	-25.1494
22	170A	31686.8	Raw	1.20541	-23.2567	Indurated, laminated, dark gray muddy sts, pyrite cementation locally
23	170A	31686.8	Solvent	1.22594	-22.9902
24	170A	31686.8	Solvent + Decarb	1.07539	-24.7374
25	214A	31780.2	Raw	1.57206	-19.9488	Indurated, mixture of light gray coarse sts and dark gray muddy sts, extensively bioturbated
26	214A	31780.2	Solvent	1.56242	-19.8045
27	214A	31780.2	Solvent + Decarb	1.35122	-25.2193
28	243A	31825.7	Raw	1.91662	-25.208	Indurated, laminated, interbedded gray silty ms, light gray sts with discontinuous laminations of light tan lvf ss
29	243A	31825.7	Solvent	1.90267	-24.6336
30	243A	31825.7	Solvent + Decarb	1.85668	-24.786
Raw = raw, untreated sample
Solvent = sample treated with solvent extraction
Solvent + Decarb = sample treated with solvent extration and decarbonization
