# Supplementary material for: Carbon isotope chemostratigraphy, geochemistry, and biostratigraphy of the Paleocene–Eocene Thermal Maximum, deepwater Wilcox Group, Gulf of Mexico (USA)
Source: Copernicus journal article supplement (doi:10.5194/cp-19-1743-2023), 2023-09-05
Supplement: Supplementary file 4 [file Table S4 Lag time analysis R1.xlsx]

## Sheet: Sheet1
Table S4. Lag time analysis
	Lower (ft MD)	Upper (ft MD)	Average (ft MD)	Notes
Apectodinium acme	31634.7	31634.7	31634.7
Onset of main CIE	31624.3	31622.1	31623.2	CIE inferred to begin between samples 130-129
Onset of CIE recovery	31595.8	31598.4	31597.1	CIE recovery inferred to begin between samples 102 and 104, possibly coinciding with change from LF-1b to LF-2 lithofacies at 31598.1 ft
End of CIE	31580.7	31580	31580.3	End of CIE inferred between samples 83 and 82
Duration of CIE (k.y.)	200	Westerhold et al. (2018)
	Lower	Upper	Average
CIE thickness (ft)	41.4	44.3	42.85
CIE thickness (m)	12.6187	13.5026	13.0607
Average sedimentation rate (m/k.y.)	0.0630936	0.0675132	0.0653034
	Depth (ft MD)			Lag (m)			Lag (k.y.)
Event	Minimum	Maximum	Average	Minimum	Maximum	Average	Minimum	Maximum	Average	±	Notes
Onset of LF1a deposition	31616.6	31616.6	31616.6	1.6764	2.34696	2.01168	24.8307	37.1981	31.0144	6.18368
End of low bioturbation	31614.2	31614.2	31614.2	2.40792	3.07848	2.7432	35.6659	48.7923	42.2291	6.56318
Change in mudstone geochem	31609.5	31610.5	31610	3.84048	4.191	4.01574	56.8849	66.4251	61.655	4.77012	Inferred to occur between samples 117 and 116
Onset of LF1b deposition	31608.2	31608.2	31608.2	4.23672	4.90728	4.572	62.754	77.7778	70.2659	7.51191
Change in sandstone geochem	31591	31591.9	31591.4	9.48842	9.87552	9.68197	140.542	156.522	148.532	7.98999	Inferred to occur between samples 97 and 96
Notes
MD = measured depth
Westerhold, T., Röhl, U., Wilkens, R. H., Gingerich, P. D., Clyde, W. C., Wing, S. L., Bowen, G. J., and Kraus, M. J.: Synchronizing early Eocene deep-sea and continental records - Cyclostratigraphic age models for the Bighorn Basin Coring Project drill cores, Clim. Past, 14, 303–319, https://doi.org/10.5194/cp-14-303-2018, 2018.
