# Supplementary material for: Carbon isotope chemostratigraphy, geochemistry, and biostratigraphy of the Paleocene–Eocene Thermal Maximum, deepwater Wilcox Group, Gulf of Mexico (USA)
Source: Copernicus journal article supplement (doi:10.5194/cp-19-1743-2023), 2023-09-05
Supplement: Supplementary file 5 [file Table S5 Trace Metals.xlsx]

## Sheet: Supplement Table 5
Depth (ft)	Al, %	Al, ppm	Mo, ppm	U, ppm	V, ppm	Mo/Al x10-4	U/Al x10-4	V/Al x10-4	EF Mo	EF U
31444.5	4.95	49500	<2	2.68	78		0.541414	15.7576		1.79596
31452.6	8.2	82000	<2	2.83	127		0.345122	15.4878		1.08415
31478	4.99	49900	<2	3.06	82		0.613226	16.4329		1.78156
31488	9.12	91200	<2	3.09	133		0.338816	14.5833		0.974781
31511.2	8.9	89000	<2	2.82	124		0.316854	13.9326		0.998876
31517.2	9.11	91100	<2	2.77	128		0.304061	14.0505		0.975851
31518.2	5.9	59000	<2	2.35	73		0.398305	12.3729		1.50678
31528.2	7.77	77700	<2	2.83	106		0.364221	13.6422		1.14414
31535.6	5.67	56700	<2	2.04	67		0.359788	11.8166		1.5679
31539.7			3	1.99
31543.5	8.9	89000	<2	3.03	148		0.340449	16.6292		0.998876
31550.1	8.3	83000	<2	3.16	128		0.380723	15.4217		1.07108
31565.9	5.33	53300	2	1.79	64	0.375235	0.335835	12.0075	1.66792	1.66792
31569.1	5.2	52000	<2	1.95	58		0.375	11.1538		1.70962
31574.9	5.82	58200	<2	1.85	69		0.317869	11.8557		1.52749
31576.5	5.48	54800	<2	2.25	64		0.410584	11.6788		1.62226
31580.7	9.55	95500	<2	2.37	125		0.248168	13.089		0.93089
31583.1	9.43	94300	<2	2.63	147		0.278897	15.5885		0.942736
31586.6	5.11	51100	<2	2.29	68		0.448141	13.3072		1.73973
31588.4	10.07	100700	<2	2.72	145		0.270109	14.3992		0.88282
31591	6.17	61700	2	2.3	69	0.324149	0.372771	11.1831	1.44084	1.44084
31591.9	6.42	64200	<2	2.16	74		0.336449	11.5265		1.38474
31593.4	9.28	92800	<2	2.73	142		0.294181	15.3017		0.957974
31594.2	8.33	83300	<2	2.92	121		0.35054	14.5258		1.06723
31599.6	7.29	72900	<2	1.43	94		0.196159	12.8944		1.21948
31607.6	7.61	76100	2	1.98	109	0.262812	0.260184	14.3233	1.1682	1.1682
31612.5	8.96	89600	<2	1.84	131		0.205357	14.6205		0.992187
31618.5	5.06	50600	2	2.21	65	0.395257	0.436759	12.8458	1.75692	1.75692
31635.6	9.18	91800	<2	2.66	159		0.28976	17.3203		0.96841
31653.2	5.41	54100	3	2.58	72	0.554529	0.476895	13.3087	1.64325	1.64325
31662.9	5.82	58200	<2	1.77	70		0.304124	12.0275		1.52749
31667.3	9.66	96600	<2	3.39	151		0.350932	15.6315		0.92029
31688.8	9.41	94100	<2	2.9	150		0.308183	15.9405		0.94474
31692.6	5.14	51400	3	2.43	64	0.583658	0.472763	12.4514	1.72957	1.72957
31723.2	5.78	57800	2	1.91	72	0.346021	0.33045	12.4567	1.53806	1.53806
31733.2	5.56	55600	2	1.99	73	0.359712	0.357914	13.1295	1.59892	1.59892
31756.1	5.92	59200	2	2	70	0.337838	0.337838	11.8243	1.50169	1.50169
31784	8.71	87100	<2	2.74	145		0.314581	16.6475		1.02067
31790.3	3.05	30500	<2	1.17	35		0.383607	11.4754		2.91475
31822.8	10.41	104100	<2	2.59	185		0.248799	17.7714		0.853987
Average Shale	8.89	88900	1	4	130	0.11	0.45	14.62
Wedepohl 1971, 1991
